# Supplementary material for: Longitudinal reallocations of time between 24-h movement behaviours and their associations with inflammation in children and adolescents: the UP&DOWN study
Source: PubMed Central journal article supplement (PMC10268438; doi:10.1186/s12966-023-01471-9), 2023-06-15
Supplement: 12966_2023_1471_MOESM2_ESM.pdf [file 12966_2023_1471_MOESM2_ESM.pdf]

**Supplementary table 1.** Arithmetic means and standard deviations of time-use variables.

|                                                | <b>Baseline</b> |           | <b>Follow-up</b> |           |
|------------------------------------------------|-----------------|-----------|------------------|-----------|
|                                                | <b>Mean</b>     | <b>SD</b> | <b>Mean</b>      | <b>SD</b> |
| Sleep (h/day)                                  | 8.77            | 1.09      | 8.39             | 1.16      |
| Sedentary behaviour (h/day)                    | 10.48           | 1.41      | 10.95            | 1.40      |
| Light physical activity (h/day)                | 2.89            | 0.76      | 2.40             | 0.64      |
| Moderate-to-vigorous physical activity (h/day) | 1.07            | 0.40      | 0.96             | 0.40      |

Abbreviations: Mean = arithmetic mean, SD = standard deviation,  $p$  = p-value from the paired samples  $t$ -test.
