# Supplementary material for: Longitudinal reallocations of time between 24-h movement behaviours and their associations with inflammation in children and adolescents: the UP&DOWN study
Source: PubMed Central journal article supplement (PMC10268438; doi:10.1186/s12966-023-01471-9), 2023-06-15
Supplement: 12966_2023_1471_MOESM3_ESM.pdf [file 12966_2023_1471_MOESM3_ESM.pdf]

**Supplementary table 2.** Estimated changes in C-reactive protein levels (mg/l) associated with reallocations of time between physical activity, sedentary behaviour, and sleep.

| Reallocation          | $\Delta'$ (95% confidence interval) |                    |                     |                     |
|-----------------------|-------------------------------------|--------------------|---------------------|---------------------|
|                       | ↓ Sleep                             | ↓ SB               | ↓ LPA               | ↓ MVPA              |
| <b>10 minutes/day</b> |                                     |                    |                     |                     |
| ↑ Sleep               |                                     | 0.01 (−0.01, 0.04) | 0.01 (−0.03, 0.04)  | 0.00 (−0.04, 0.05)  |
| ↑ SB                  | −0.01 (−0.04, 0.01)                 |                    | −0.01 (−0.05, 0.03) | −0.01 (−0.06, 0.04) |
| ↑ LPA                 | −0.01 (−0.04, 0.02)                 | 0.01 (−0.03, 0.05) |                     | 0.00 (−0.07, 0.06)  |
| ↑ MVPA                | 0.00 (−0.04, 0.04)                  | 0.01 (−0.03, 0.06) | 0.00 (−0.06, 0.06)  |                     |
| <b>30 minutes/day</b> |                                     |                    |                     |                     |
| ↑ Sleep               |                                     | 0.04 (−0.04, 0.13) | 0.02 (−0.09, 0.12)  | 0.01 (−0.16, 0.17)  |
| ↑ SB                  | −0.04 (−0.13, 0.04)                 |                    | −0.03 (−0.15, 0.09) | −0.04 (−0.22, 0.15) |
| ↑ LPA                 | −0.02 (−0.11, 0.07)                 | 0.03 (−0.08, 0.14) |                     | −0.01 (−0.23, 0.21) |
| ↑ MVPA                | −0.01 (−0.12, 0.09)                 | 0.03 (−0.09, 0.15) | 0.00 (−0.16, 0.17)  |                     |
| <b>60 minutes/day</b> |                                     |                    |                     |                     |
| ↑ Sleep               |                                     | 0.09 (−0.09, 0.27) | 0.03 (−0.19, 0.25)  | −0.03 (−0.78, 0.72) |
| ↑ SB                  | −0.09 (−0.27, 0.09)                 |                    | −0.06 (−0.31, 0.20) | −0.11 (−0.90, 0.67) |
| ↑ LPA                 | −0.04 (−0.21, 0.13)                 | 0.06 (−0.15, 0.26) |                     | −0.06 (−0.90, 0.78) |
| ↑ MVPA                | −0.03 (−0.22, 0.15)                 | 0.06 (−0.16, 0.28) | 0.00 (−0.33, 0.33)  |                     |

Abbreviations:  $\Delta'$  = estimated change in C-reactive protein level for the reallocation of time from the behaviour in the column to the behaviour in the row; SB = sedentary behaviour, LPA = light physical activity, MVPA = moderate-to-vigorous physical activity.
