# Supplementary material for: Longitudinal reallocations of time between 24-h movement behaviours and their associations with inflammation in children and adolescents: the UP&DOWN study
Source: PubMed Central journal article supplement (PMC10268438; doi:10.1186/s12966-023-01471-9), 2023-06-15
Supplement: 12966_2023_1471_MOESM4_ESM.pdf [file 12966_2023_1471_MOESM4_ESM.pdf]

**Supplementary table 3.** Estimated changes in interleukin-6 levels (pg/ml) associated with reallocations of time between physical activity, sedentary behaviour and sleep.

| Reallocation          | $\Delta'$ (95% confidence interval) |                     |                    |                      |
|-----------------------|-------------------------------------|---------------------|--------------------|----------------------|
|                       | ↓ Sleep                             | ↓ SB                | ↓ LPA              | ↓ MVPA               |
| <b>10 minutes/day</b> |                                     |                     |                    |                      |
| ↑ Sleep               |                                     | 0.05 (−0.13, 0.23)  | 0.26 (−0.03, 0.54) | −0.39 (−1.03, 0.25)  |
| ↑ SB                  | −0.05 (−0.23, 0.13)                 |                     | 0.21 (−0.07, 0.48) | −0.44 (−1.04, 0.16)  |
| ↑ LPA                 | −0.25 (−0.52, 0.03)                 | −0.19 (−0.45, 0.06) |                    | −0.64 (−1.42, 0.15)  |
| ↑ MVPA                | 0.33 (−0.22, 0.88)                  | 0.38 (−0.13, 0.89)  | 0.59 (−0.12, 1.30) |                      |
| <b>30 minutes/day</b> |                                     |                     |                    |                      |
| ↑ Sleep               |                                     | 0.15 (−0.38, 0.68)  | 0.81 (−0.08, 1.70) | −1.49 (−3.84, 0.86)  |
| ↑ SB                  | −0.15 (−0.70, 0.39)                 |                     | 0.66 (−0.20, 1.52) | −1.64 (−3.87, 0.59)  |
| ↑ LPA                 | −0.71 (−1.49, 0.08)                 | −0.55 (−1.29, 0.19) |                    | −2.19 (−4.95, 0.57)  |
| ↑ MVPA                | 0.85 (−0.63, 2.34)                  | 1.01 (−0.34, 2.36)  | 1.67 (−0.33, 3.67) |                      |
| <b>60 minutes/day</b> |                                     |                     |                    |                      |
| ↑ Sleep               |                                     | 0.30 (−0.77, 1.36)  | 1.78 (−0.17, 3.73) | −6.92 (−17.15, 3.31) |
| ↑ SB                  | −0.31 (−1.41, 0.78)                 |                     | 1.49 (−0.40, 3.37) | −7.21 (−17.22, 2.79) |
| ↑ LPA                 | −1.34 (−2.84, 0.16)                 | −1.02 (−2.43, 0.39) |                    | −8.24 (−19.19, 2.72) |
| ↑ MVPA                | 1.43 (−1.17, 4.03)                  | 1.75 (−0.58, 4.08)  | 3.23 (−0.56, 7.02) |                      |

Abbreviations:  $\Delta'$  = estimated change in interleukin-6 level for the reallocation of time from the behaviour in the column to the behaviour in the row; SB = sedentary behaviour, LPA = light physical activity, MVPA = moderate-to-vigorous physical activity.
