# Supplementary material for: Longitudinal reallocations of time between 24-h movement behaviours and their associations with inflammation in children and adolescents: the UP&DOWN study
Source: PubMed Central journal article supplement (PMC10268438; doi:10.1186/s12966-023-01471-9), 2023-06-15
Supplement: 12966_2023_1471_MOESM5_ESM.pdf [file 12966_2023_1471_MOESM5_ESM.pdf]

**Supplementary table 4.** Estimated changes in adiponectin levels ( $\times 10^6$  pg/ml) associated with reallocations of time between physical activity, sedentary behaviour and sleep.

| Reallocation          | $\Delta'$ (95% confidence interval) |                    |                     |                     |
|-----------------------|-------------------------------------|--------------------|---------------------|---------------------|
|                       | ↓ Sleep                             | ↓ SB               | ↓ LPA               | ↓ MVPA              |
| <b>10 minutes/day</b> |                                     |                    |                     |                     |
| ↑ Sleep               |                                     | 0.14 (−0.01, 0.29) | 0.12 (−0.10, 0.34)  | 0.10 (−0.24, 0.44)  |
| ↑ SB                  | −0.14 (−0.29, 0.01)                 |                    | −0.02 (−0.21, 0.17) | −0.04 (−0.35, 0.28) |
| ↑ LPA                 | −0.12 (−0.33, 0.09)                 | 0.02 (−0.16, 0.21) |                     | −0.02 (−0.44, 0.40) |
| ↑ MVPA                | −0.10 (−0.40, 0.20)                 | 0.04 (−0.23, 0.31) | 0.02 (−0.36, 0.41)  |                     |
| <b>30 minutes/day</b> |                                     |                    |                     |                     |
| ↑ Sleep               |                                     | 0.42 (−0.04, 0.88) | 0.36 (−0.32, 1.04)  | 0.31 (−0.94, 1.56)  |
| ↑ SB                  | −0.42 (−0.89, 0.04)                 |                    | −0.05 (−0.66, 0.56) | −0.10 (−1.27, 1.07) |
| ↑ LPA                 | −0.36 (−0.96, 0.25)                 | 0.08 (−0.46, 0.61) |                     | −0.03 (−1.49, 1.43) |
| ↑ MVPA                | −0.30 (−1.10, 0.51)                 | 0.14 (−0.59, 0.86) | 0.08 (−1.02, 1.17)  |                     |
| <b>60 minutes/day</b> |                                     |                    |                     |                     |
| ↑ Sleep               |                                     | 0.83 (−0.08, 1.75) | 0.74 (−0.73, 2.20)  | 0.78 (−4.58, 6.14)  |
| ↑ SB                  | −0.86 (−1.79, 0.08)                 |                    | −0.06 (−1.41, 1.28) | −0.02 (−5.24, 5.20) |
| ↑ LPA                 | −0.71 (−1.88, 0.46)                 | 0.18 (−0.84, 1.20) |                     | 0.12 (−5.60, 5.84)  |
| ↑ MVPA                | −0.59 (−2.03, 0.85)                 | 0.29 (−0.96, 1.55) | 0.20 (−1.92, 2.32)  |                     |

Abbreviations: TNF = tumour necrosis factor,  $\Delta'$  = estimated change in adiponectin level for the reallocation of time from the behaviour in the column to the behaviour in the row; SB = sedentary behaviour, LPA = light physical activity, MVPA = moderate-to-vigorous physical activity.
